## Associations of exercise-based cardiac rehabilitation with all-cause mortality among patients with atrial fibrillation

Buckley B.<sup>1</sup>; Harrison S.<sup>1</sup>; Fazio-Eynullayeva E.<sup>2</sup>; Underhill P.<sup>3</sup>; Lane D.<sup>1</sup>; Thijssen D.<sup>4</sup>; Lip G.<sup>1</sup>

<sup>1</sup>University of Liverpool, Liverpool, United Kingdom of Great Britain & Northern Ireland

<sup>2</sup>TriNetX, Cambridge, MA, United States of America

<sup>3</sup>TriNetX, London, United Kingdom of Great Britain & Northern Ireland

<sup>4</sup>Liverpool John Moores University, Liverpool, United Kingdom of Great Britain & Northern Ireland

**Funding Acknowledgements:** Type of funding sources: None.

**Background:** There is limited evidence of long-term impact of exercise-based CR on clinical endpoints for patients with AF. We therefore compared 18-month all-cause mortality, hospitalisation, stroke, and heart failure in patients with AF and an electronic medical record (EMR) of exercise-based CR to matched controls.

### Methods and Results

This retrospective cohort study included patient data obtained on 11 December 2020, from a global federated health research network. AF patients undergoing exercise-based CR were propensity score matched to AF patients without exercise-based CR by age, sex, race, medication, and co-morbidities. We ascertained 18-month incidence of all-cause mortality, hospitalisation, stroke, and heart failure.

Of 1,350,886 patients with AF, 10,625 patients had an EMR of exercise-based CR within 6-months of incident AF. The propensity score matched cohort of 21,250 patients with AF demonstrated that exercise-based CR was associated with 64% lower odds of all-cause mortality (odds ratio 0.36, 95% confidence interval (CI) 0.33-0.40), 41% lower odds of hospitalisation (0.59, 95% CI 0.56-0.63), and 17% lower odds of incident stroke (0.83, 95% CI 0.71-0.98) compared to propensity score matched controls. No significant associations were shown for heart failure at 18-months (0.92, 95% CI 0.81-1.02). The beneficial association of exercise-based CR on all-cause mortality was independent of sex, older age, comorbidities, and AF subtype.

**CONCLUSIONS:** Exercise-based CR among patients with incident AF was associated with lower odds of all-cause mortality, hospitalisation, and stroke at 18-months follow-up. The longitudinal nature of this retrospective follow-up study strongly supports the provision of exercise programmes for patients with incident AF.
